# Supplementary material
Source: PubMed Central journal article supplement (PMC3280435)
Supplement: 97320630007375S1.pdf [file 97320630007375S1.pdf]

## Supplementary Material:

**Table 1: Details of predicted miRNA in *Senecio vulgaris*(Groundsel)**

| S. No. | New miRNA  | Gene ID  | Source | % of AU of Pre-miRNA | Predicted miRNA Sequence | Free Energy |
|--------|------------|----------|--------|----------------------|--------------------------|-------------|
| 1      | svu-mir-1  | 89511128 | GSS    | 60.29                | UGACAGAAGAGAGAGAGCACA    | -56.8       |
| 2      | svu-mir-2  | 89506713 | EST    | 63.25                | CUGCAUCCUGAGGU           | -51.7       |
| 3      | svu-mir-3a | 89502346 | EST    | 64.31                | UGACAGAAGAGAGUGAGCAC     | -45.9       |
| 4      | svu-mir-3b | 89502346 | GSS    | 64.31                | UGACAGAAGAGAGUGAGCAC     | -39.7       |
| 5      | svu-mir-4a | 89511108 | GSS    | 66.2                 | UCAUCUUCAUCAUCAUC        | -19.6       |
| 6      | svu-mir-5  | 89510138 | EST    | 66.35                | AAUUCUGUCAAUUC           | -32.9       |
| 7      | svu-mir-6  | 89506601 | EST    | 69.35                | UUCUCUGAUUUUGA           | -32.9       |
| 8      | svu-mir-7  | 89508640 | GSS    | 73.28                | GAUUGGUGUCAGAGCCA        | -31.4       |
| 9      | svu-mir-8  | 89507543 | EST    | 82.33                | CAAUUGGUAUCAGAGC         | -39.8       |
| 10     | svu-mir-4b | 89511108 | EST    | 103.2                | UCAUCUUCAUCAUCAUC        | -41.8       |
